# Supplementary material
Source: publisher site journal article supplement (https://www.degruyter.com/publication/journal_key/HTM/downloadAsset/HTM_Manuscript%20Checklist%20HTM.pdf)
Supplement: Supplementary file 1 [file HTM_Manuscript%20Checklist%20HTM.pdf]

## General format and length of article types accepted for submission

|                                       | Non-typeset pages | Word count article title | Word count in abstract | Number of keywords | Number of Tables & Figures                                                                  | Number of references | Article                                                                                                                                                      |
|---------------------------------------|-------------------|--------------------------|------------------------|--------------------|---------------------------------------------------------------------------------------------|----------------------|--------------------------------------------------------------------------------------------------------------------------------------------------------------|
| Research Article or Technical Article | 6–10              | Max. 50                  | Max. 200               | 5–6                | Max. 12 in total<br>(It is not mandatory that your article includes tables and/or figures.) | Min. 5               | Structured into Abstract<br>Keywords<br>1 Introduction<br>2 Schedule of experiments<br>3 Experiments<br>4 Results<br>5 Conclusions / Discussion<br>6 Summary |

Please note the following regarding the preparation and submission of your work:

- Please carefully read the detailed [Instructions for Authors](#) which guide you through manuscript preparation. All questions regarding peer review, turnaround times, proofreading and copyright are tackled here.
- The HTM is a bilingual (German-English) journal. The translation to the second language can be managed via the Editorial Office or the authors. Please note that German translations can be proofread by the Editorial Office whereas the proofreading of the English translations need to be arranged for by the authors.
- Please make sure that the references are formatted according to ACS numbered reference style.
- Submit manuscripts exclusively online at: <https://mc.manuscriptcentral.com/htm>
- Please indicate clearly whether the manuscript you submit is a Research Article or a Technical Article (check section “General format and manuscript elements” in [Instructions for Authors](#)) and also see the general requirements for the submission of a scientific paper or a technical-industrial paper below.
- Please upload each figure separately as .jpg, .eps, .png, .tiff or PDF file in a Zip folder.
- Please make sure that you have filled in the [Template for Ethical and Legal Declarations](#).
- Proofreading: You will receive an e-mail notification once your galley proof is ready for proofreading. Please check your galley proof carefully as after approval no further changes will be considered.
- There are **NO** fees due for publication in the HTM. You may, however, publish your article Open Access (standard fee: €2,000 (plus VAT if applicable)). For more information on De Gruyter’s open access policy as well as funding and discounts, please read our [Open Access Policies](#).
- Authors may publish their articles in a public repository after an embargo period of 12 months (see De Gruyter’s [Repository Policy](#)). Only the accepted author version of the manuscript, not the PDF version of the published article, can be published (see De Gruyter’s [Sharing Policy](#)).

*General requirements for submissions****For a Research Article (scientific paper):***

- corresponds to the subject area of HTM,
- contains new and previously unpublished content,
- meets the standard of HTM in terms of approach, state of knowledge, results and conclusions,
- contains at least five references to renowned sources/references.

***For a Technical Article (technical-industrial paper):***

- concerns HTM focus topics and related fields,
- technical objective,
- state of the art,
- solution approach (new plant technology, etc.),
- results obtained with the new technical solution,
- discussion of the results in comparison with the state of the art,
- contains generally usable information (no predominant advertising literature),
- contains at least five references to renowned sources/references.

**Please contact for any further questions:**

Editorial office: Belinda Schicks ([schicks@iwt-bremen.de](mailto:schicks@iwt-bremen.de))

Leibniz-Institut für Werkstofforientierte Technologien – IWT (Bremen, Germany)

Publisher: Dagmara Magryta ([Dagmara.Magryta@degruyter.com](mailto:Dagmara.Magryta@degruyter.com))

Journal Coordinator, De Gruyter
